# Supplementary material for: Syntheses and characterizations of six Co(ii) and Mn(ii) coordination polymers based on amino-substituted 5-aminoisophthalate and flexible bis(imidazolyl) ligands
Source: Royal Society of Chemistry journal article supplement (doi:10.1039/c5nj00706b), 2015-01-01
Supplement: c5nj00706b1.pdf [file c5nj00706b1.pdf]

**Syntheses and characterizations of six Co(II) and Mn(II)  
coordination polymers based on amino-substituted 5-  
aminoisophthalate and flexible bis(imidazolyl) ligands**

Xiaoju Li,\* Xiaofei Sun, Xinxiong Li and Xiahong Xu

**Contents**

**Figure S1** View of 2D→3D interdigitating network along the *a* axis in **1**.

**Figure S2** Topological view of ABAB packing of interdigitating 2-D layer along the *b* axis in **1**.

**Figure S3** XRD patterns for **1-6**.

**Table S1.** Crystal data and structure refinement results for **1-6**.

**Table S2** Selected bond lengths and angles for **1-6**.

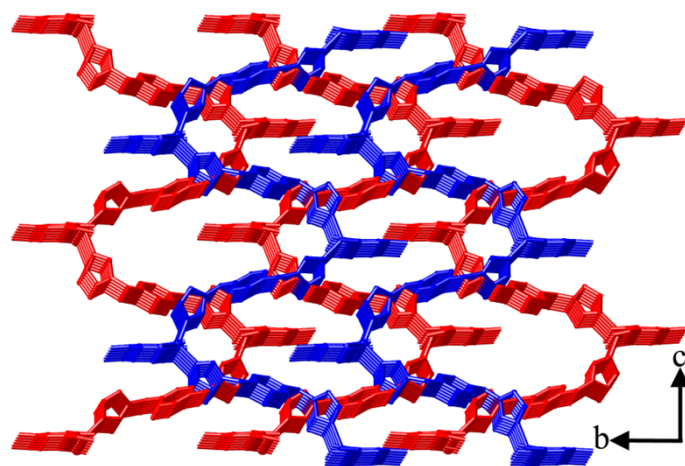

**Figure S1** View of 2D→3D interdigitating network along the *a* axis in **1**.

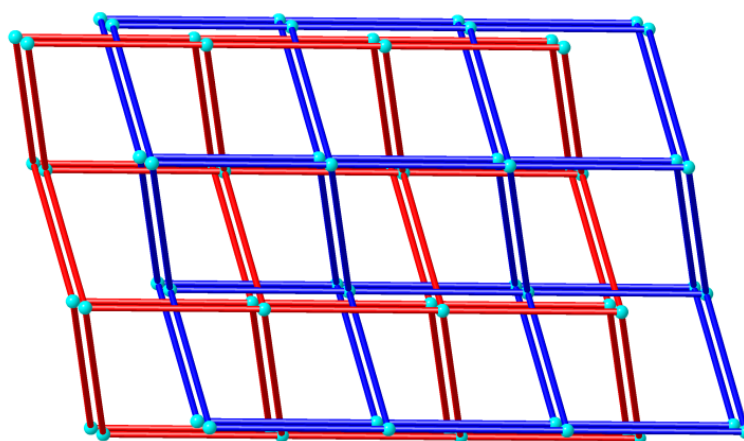

**Figure S2** Topological view of ABAB packing of interdigitating 2-D layer along the *b* axis in **1**.

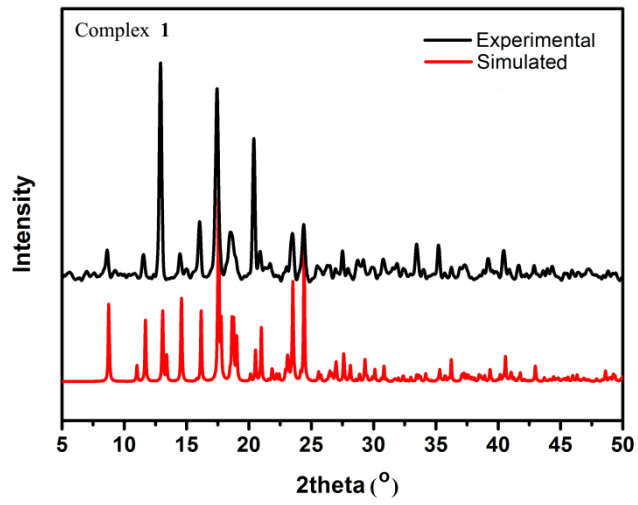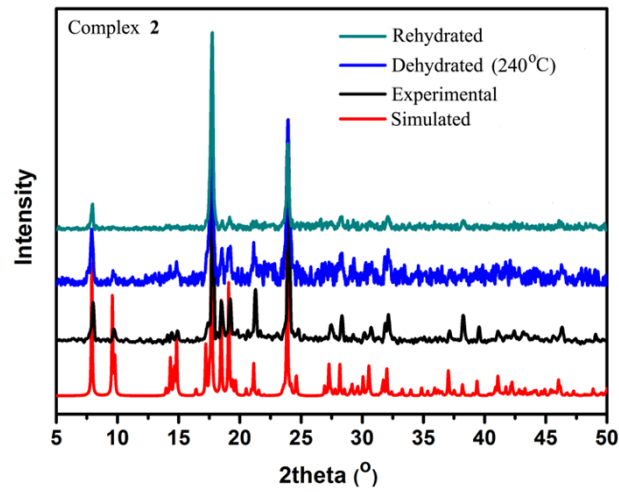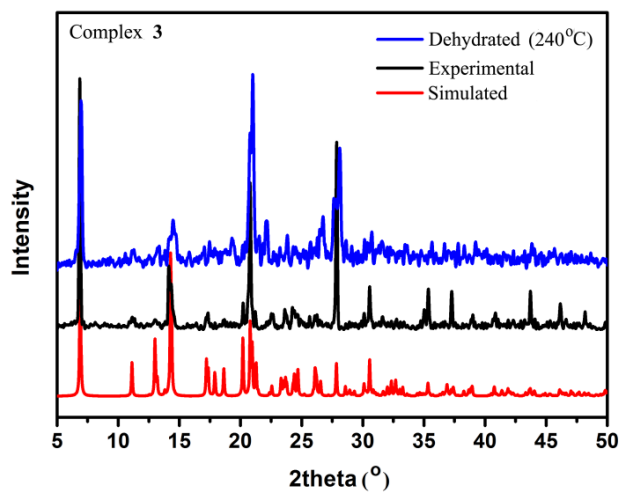

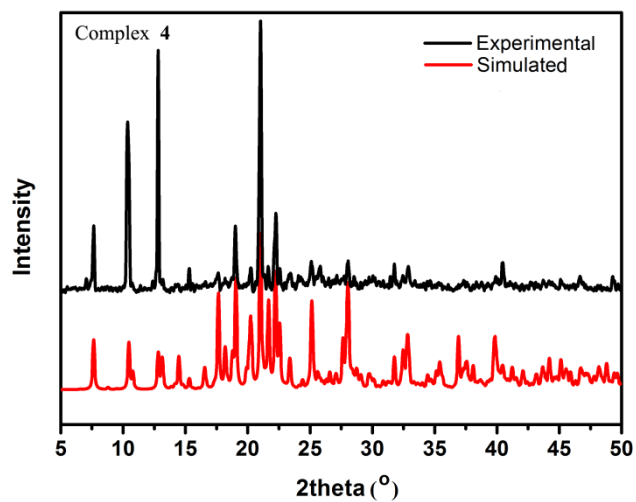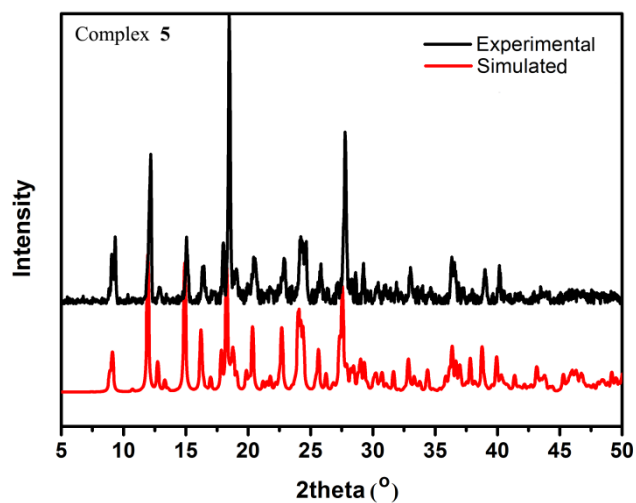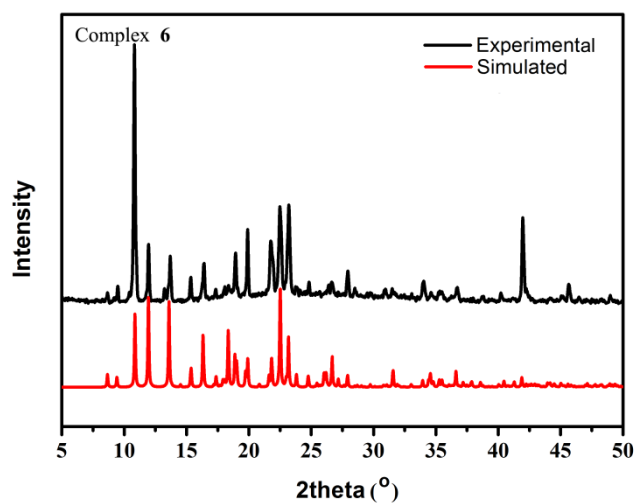

**Figure S3** XRD patterns for complexes 1-6.

**Table S1.** Crystal data and structure refinement results for **1-6**.

|                                                                        | <b>1</b>                                                                       | <b>2</b>                                                         | <b>3</b>                                                         |
|------------------------------------------------------------------------|--------------------------------------------------------------------------------|------------------------------------------------------------------|------------------------------------------------------------------|
| Empirical formula                                                      | C <sub>22</sub> H <sub>19</sub> N <sub>5</sub> O <sub>4</sub> Co               | C <sub>15</sub> H <sub>14</sub> N <sub>3</sub> O <sub>5</sub> Co | C <sub>16</sub> H <sub>16</sub> N <sub>3</sub> O <sub>5</sub> Co |
| Formula weight                                                         | 476.35                                                                         | 375.22                                                           | 389.25                                                           |
| Crystal system                                                         | Monoclinic                                                                     | Triclinic                                                        | Monoclinic                                                       |
| Space group                                                            | <i>P</i> 2 <sub>1</sub> / <i>c</i>                                             | <i>P</i> -1                                                      | <i>P</i> 2 <sub>1</sub> / <i>c</i>                               |
| <i>a</i> (Å)                                                           | 10.225 (5)                                                                     | 6.630(4)                                                         | 12.8113(10)                                                      |
| <i>b</i> (Å)                                                           | 13.530(6)                                                                      | 10.167(5)                                                        | 7.8747(6)                                                        |
| <i>c</i> (Å)                                                           | 15.503(8)                                                                      | 12.475(7)                                                        | 15.8919(17)                                                      |
| $\alpha$ (°)                                                           | 90                                                                             | 109.11(3)                                                        | 90                                                               |
| $\beta$ (°)                                                            | 102.795(9)                                                                     | 103.70(2)                                                        | 90.871(8)                                                        |
| $\gamma$ (°)                                                           | 90                                                                             | 100.43(3)                                                        | 90                                                               |
| <i>V</i> (Å <sup>3</sup> )                                             | 2091.6(17)                                                                     | 740.7(7)                                                         | 1603.1(2)                                                        |
| <i>Z</i>                                                               | 4                                                                              | 2                                                                | 4                                                                |
| F(000)                                                                 | 980                                                                            | 384                                                              | 800                                                              |
| $\rho_{\text{calcd}}$ (g cm <sup>-3</sup> )                            | 1.513                                                                          | 1.682                                                            | 1.613                                                            |
| $\mu$ (mm <sup>-1</sup> )                                              | 0.861                                                                          | 1.191                                                            | 1.104                                                            |
| Reflections collected                                                  | 17615                                                                          | 5814                                                             | 12196                                                            |
| Unique reflections                                                     | 4753                                                                           | 3361                                                             | 3646                                                             |
| Parameters                                                             | 289                                                                            | 225                                                              | 235                                                              |
| <i>R</i> <sub>int</sub>                                                | 0.0531                                                                         | 0.0243                                                           | 0.0230                                                           |
| S on F <sup>2</sup>                                                    | 1.078                                                                          | 1.050                                                            | 1.095                                                            |
| <i>R</i> <sub>1</sub> ( <i>I</i> >2σ( <i>I</i> )) <sup>a</sup>         | 0.0540                                                                         | 0.0372                                                           | 0.0332                                                           |
| <i>wR</i> <sub>2</sub> ( <i>I</i> >2σ( <i>I</i> )) <sup>b</sup>        | 0.1043                                                                         | 0.0820                                                           | 0.0845                                                           |
| <i>R</i> <sub>1</sub> (all data) <sup>a</sup>                          | 0.0853                                                                         | 0.0487                                                           | 0.0362                                                           |
| <i>wR</i> <sub>2</sub> (all data) <sup>b</sup>                         | 0.0853                                                                         | 0.0878                                                           | 0.0880                                                           |
| $\Delta\rho_{\text{max}}$ and $\rho_{\text{min}}$ [e·Å <sup>-3</sup> ] | 0.394 and -0.404                                                               | 0.393 and -0.554                                                 | 0.408 and -0.463                                                 |
|                                                                        | <b>4</b>                                                                       | <b>5</b>                                                         | <b>6</b>                                                         |
| Empirical formula                                                      | C <sub>44</sub> H <sub>38</sub> N <sub>10</sub> O <sub>8</sub> Mn <sub>2</sub> | C <sub>27</sub> H <sub>34</sub> N <sub>6</sub> O <sub>7</sub> Mn | C <sub>21</sub> H <sub>17</sub> N <sub>4</sub> O <sub>4</sub> Mn |
| Formula weight                                                         | 944.72                                                                         | 609.54                                                           | 444.33                                                           |
| Crystal system                                                         | Triclinic                                                                      | Monoclinic                                                       | Monoclinic                                                       |
| Space group                                                            | <i>P</i> -1                                                                    | <i>P</i> 2 <sub>1</sub> / <i>c</i>                               | <i>P</i> 2 <sub>1</sub> / <i>c</i>                               |
| <i>a</i> (Å)                                                           | 11.6898(19)                                                                    | 9.888(6)                                                         | 10.4640(19)                                                      |
| <i>b</i> (Å)                                                           | 12.7428(18)                                                                    | 19.869(12)                                                       | 15.5072(12)                                                      |
| <i>c</i> (Å)                                                           | 13.723 (2)                                                                     | 15.809(10)                                                       | 16.689(2)                                                        |
| $\alpha$ (°)                                                           | 79.440(4)                                                                      | 90                                                               | 90                                                               |
| $\beta$ (°)                                                            | 82.520(3)                                                                      | 101.072(12)                                                      | 102.865(8)                                                       |

|                                                                                        |                  |                  |                  |
|----------------------------------------------------------------------------------------|------------------|------------------|------------------|
| $\gamma$ (°)                                                                           | 84.502(4)        | 90               | 90               |
| $V(\text{Å}^3)$                                                                        | 1987.1(5)        | 2909(3)          | 1959.1(5)        |
| $Z$                                                                                    | 2                | 4                | 4                |
| F(000)                                                                                 | 972              | 1276             | 912              |
| $\rho_{\text{calcd}} (\text{g cm}^{-3})$                                               | 1.579            | 1.392            | 1.506            |
| $\mu (\text{mm}^{-1})$                                                                 | 0.707            | 0.508            | 0.711            |
| Reflections collected                                                                  | 16887            | 22426            | 14947            |
| Unique reflections                                                                     | 8837             | 6619             | 4467             |
| Parameters                                                                             | 577              | 393              | 271              |
| $R_{\text{int}}$                                                                       | 0.0221           | 0.0499           | 0.0305           |
| S on $F^2$                                                                             | 0.990            | 1.179            | 1.090            |
| $R_1(I > 2\sigma(I))^a$                                                                | 0.0355           | 0.0691           | 0.0393           |
| $wR_2(I > 2\sigma(I))^b$                                                               | 0.0919           | 0.1546           | 0.0924           |
| $R_1$ (all data) <sup>a</sup>                                                          | 0.0473           | 0.1126           | 0.0472           |
| $wR_2$ (all data) <sup>b</sup>                                                         | 0.0986           | 0.1784           | 0.0973           |
| $\Delta\rho_{\text{max}}$ and $\Delta\rho_{\text{min}} [\text{e} \cdot \text{Å}^{-3}]$ | 0.377 and -0.271 | 0.343 and -0.714 | 0.247 and -0.375 |

$$^a R_1 = \sum ||F_o| - |F_c|| / \sum |F_o|. \quad ^b wR_2 = [\sum w(F_o^2 - F_c^2)^2 / \sum w(F_o^2)^2]^{1/2}$$

**Table S2** Selected bond lengths (Å) and Angles (°) for **1-6**.

| <b>1</b>            |            |                     |            |
|---------------------|------------|---------------------|------------|
| Co(1)-O(4)#1        | 1.990(2)   | Co(1)-O(1)          | 1.996(2)   |
| Co(1)-N(2)          | 2.004(3)   | Co(1)-N(5)#2        | 2.013(3)   |
| O(4)#1-Co(1)-O(1)   | 100.81(9)  | O(4)#1-Co(1)-N(2)   | 112.22(9)  |
| O(1)-Co(1)-N(2)     | 111.57(9)  | O(4)#1-Co(1)-N(5)#2 | 106.91(9)  |
| O(1)-Co(1)-N(5)#2   | 110.64(10) | N(2)-Co(1)-N(5)#2   | 113.85(11) |
| <b>2</b>            |            |                     |            |
| Co(1)-O(4)#1        | 2.0173(18) | Co(1)-N(1)          | 2.087(2)   |
| Co(1)-O(2)          | 2.1264(18) | Co(1)-O(1W)         | 2.141(2)   |
| Co(1)-N(3)#2        | 2.198(2)   | Co(1)-O(1)          | 2.2804(19) |
| O(4)#1-Co(1)-N(1)   | 94.80(8)   | O(4)#1-Co(1)-O(2)   | 158.51(7)  |
| N(1)-Co(1)-O(2)     | 88.60(8)   | O(4)#1-Co(1)-O(1W)  | 94.29(8)   |
| N(1)-Co(1)-O(1W)    | 92.40(8)   | O(2)-Co(1)-O(1W)    | 106.78(7)  |
| O(4)#1-Co(1)-N(3)#2 | 90.62(8)   | N(1)-Co(1)-N(3)#2   | 172.57(7)  |
| O(2)-Co(1)-N(3)#2   | 88.20(7)   | O(1W)-Co(1)-N(3)#2  | 82.12(8)   |
| O(4)#1-Co(1)-O(1)   | 98.89(7)   | N(1)-Co(1)-O(1)     | 92.51(7)   |
| O(2)-Co(1)-O(1)     | 59.71(6)   | O(1W)-Co(1)-O(1)    | 165.49(7)  |
| N(3)#2-Co(1)-O(1)   | 91.66(7)   |                     |            |

---

|                      |            |                      |            |
|----------------------|------------|----------------------|------------|
|                      |            | <b>3</b>             |            |
| Co(1)-O(4)           | 1.9566(12) | Co(1)-O(1)#1         | 2.0204(12) |
| Co(1)-N(2)           | 2.0317(16) | Co(1)-N(1)#2         | 2.0922(14) |
| O(4)-Co(1)-O(1)#1    | 104.02(5)  | O(4)-Co(1)-N(2)      | 105.09(6)  |
| O(1)#1-Co(1)-N(2)    | 109.79(6)  | O(4)-Co(1)-N(1)#2    | 106.04(5)  |
| O(1)#1-Co(1)-N(1)#2  | 107.14(5)  | N(2)-Co(1)-N(1)#2    | 123.13(6)  |
|                      |            | <b>4</b>             |            |
| Mn(1)-O(1)           | 2.1183(18) | Mn(1)-O(5)           | 2.1533(19) |
| Mn(1)-N(7)           | 2.258(2)   | Mn(1)-N(3)           | 2.260(2)   |
| Mn(1)-O(3)#1         | 2.2984(19) | Mn(1)-O(4)#1         | 2.3224(19) |
| Mn(2)-O(2)           | 2.1262(19) | Mn(2)-O(6)           | 2.1285(18) |
| Mn(2)-N(10)#2        | 2.236(2)   | Mn(2)-N(6)#3         | 2.246(2)   |
| Mn(2)-O(7)#4         | 2.2618(19) | Mn(2)-O(8)#4         | 2.3508(19) |
| O(1)-Mn(1)-O(5)      | 112.46(7)  | O(1)-Mn(1)-N(7)      | 94.69(8)   |
| O(5)-Mn(1)-N(7)      | 90.68(8)   | O(1)-Mn(1)-N(3)      | 88.26(8)   |
| O(5)-Mn(1)-N(3)      | 86.19(8)   | N(7)-Mn(1)-N(3)      | 176.35(8)  |
| O(1)-Mn(1)-O(3)#1    | 94.69(7)   | O(5)-Mn(1)-O(3)#1    | 152.85(7)  |
| N(7)-Mn(1)-O(3)#1    | 87.58(8)   | N(3)-Mn(1)-O(3)#1    | 94.33(8)   |
| O(1)-Mn(1)-O(4)#1    | 150.82(8)  | O(5)-Mn(1)-O(4)#1    | 96.17(7)   |
| N(7)-Mn(1)-O(4)#1    | 90.31(8)   | N(3)-Mn(1)-O(4)#1    | 88.15(8)   |
| O(3)#1-Mn(1)-O(4)#1  | 56.76(6)   | O(2)-Mn(2)-O(6)      | 109.05(7)  |
| O(2)-Mn(2)-N(10)#2   | 89.51(8)   | O(6)-Mn(2)-N(10)#2   | 85.80(8)   |
| O(2)-Mn(2)-N(6)#3    | 94.16(9)   | O(6)-Mn(2)-N(6)#3    | 93.70(8)   |
| N(10)#2-Mn(2)-N(6)#3 | 176.25(8)  | O(2)-Mn(2)-O(7)#4    | 150.00(7)  |
| O(6)-Mn(2)-O(7)#4    | 100.89(7)  | N(10)#2-Mn(2)-O(7)#4 | 90.84(8)   |
| N(6)#3-Mn(2)-O(7)#4  | 85.61(8)   | O(2)-Mn(2)-O(8)#4    | 92.93(7)   |
| O(6)-Mn(2)-O(8)#4    | 157.34(8)  | N(10)#2-Mn(2)-O(8)#4 | 89.04(8)   |
| N(6)#3-Mn(2)-O(8)#4  | 90.02(8)   | O(7)#4-Mn(2)-O(8)#4  | 57.09(6)   |
|                      |            | <b>5</b>             |            |
| Mn(1)-O(1)           | 2.150(2)   | Mn(1)-O(1W)          | 2.260(3)   |
| Mn(1)-N(1)           | 2.284(3)   | Mn(2)-O(3)           | 2.164(2)   |
| Mn(2)-O(2W)          | 2.243(3)   | Mn(2)-N(4)           | 2.259(3)   |
| O(1)-Mn(1)-O(1)#1    | 179.999(1) | O(1)-Mn(1)-O(1W)#1   | 90.68(9)   |
| O(1)-Mn(1)-O(1W)     | 89.32(9)   | O(1W)#1-Mn(1)-O(1W)  | 179.998(1) |
| O(1)-Mn(1)-N(1)#1    | 91.58(9)   | O(1W)-Mn(1)-N(1)#1   | 85.65(10)  |
| O(1)-Mn(1)-N(1)      | 88.43(9)   | O(1W)#1-Mn(1)-N(1)   | 85.65(10)  |
| O(1W)-Mn(1)-N(1)     | 94.35(10)  | N(1)#1-Mn(1)-N(1)    | 179.999(1) |
| O(3)#2-Mn(2)-O(3)    | 180.00(12) | O(3)-Mn(2)-O(2W)#2   | 92.32(9)   |
| O(3)-Mn(2)-O(2W)     | 87.68(9)   | O(2W)#2-Mn(2)-O(2W)  | 180.000(1) |
| O(3)#2-Mn(2)-N(4)    | 90.99(10)  | O(3)-Mn(2)-N(4)      | 89.01(10)  |
| O(2W)#2-Mn(2)-N(4)   | 91.71(11)  | O(2W)-Mn(2)-N(4)     | 88.29(11)  |
| N(4)-Mn(2)-N(4)#2    | 180.00(16) |                      |            |
|                      |            | <b>6</b>             |            |

---

|                   |            |                     |            |
|-------------------|------------|---------------------|------------|
| Mn(1)-O(4)#1      | 2.0714(13) | Mn(1)-N(2)          | 2.2164(16) |
| Mn(1)-O(1)#2      | 2.2180(13) | Mn(1)-O(2)#2        | 2.2699(13) |
| Mn(1)-N(4)        | 2.2920(15) | Mn(1)-N(3)          | 2.3162(16) |
| O(4)#1-Mn(1)-N(2) | 90.76(6)   | O(4)#1-Mn(1)-O(1)#2 | 114.70(5)  |
| N(2)-Mn(1)-O(1)#2 | 98.78(6)   | O(4)#1-Mn(1)-O(2)#2 | 172.43(5)  |
| N(2)-Mn(1)-O(2)#2 | 86.78(6)   | O(1)#2-Mn(1)-O(2)#2 | 58.75(5)   |
| O(4)#1-Mn(1)-N(4) | 96.50(6)   | N(2)-Mn(1)-N(4)     | 100.75(6)  |
| O(1)#2-Mn(1)-N(4) | 142.73(5)  | O(2)#2-Mn(1)-N(4)   | 90.99(5)   |
| O(4)#1-Mn(1)-N(3) | 90.90(6)   | N(2)-Mn(1)-N(3)     | 172.45(6)  |
| O(1)#2-Mn(1)-N(3) | 87.21(6)   | O(2)#2-Mn(1)-N(3)   | 92.46(6)   |
| N(4)-Mn(1)-N(3)   | 71.75(5)   |                     |            |

Symmetry transformation used to generate equivalent atoms: **(1)** #1  $x+1, y, z$ ; #2  $x, -y+1/2, z+1/2$ ; **(2)** #1  $x, y+1, z$ ; #2  $-x+2, -y+1, -z+2$ ; **(3)** #1  $x, -y+1/2, z-1/2$ ; #2  $x, -y-1/2, z-1/2$ ; **(4)** #1  $-x, -y+2, -z+1$ ; #2  $-x+1, -y+2, -z$ ; **(5)** #1  $-x+2, -y+2, -z+1$ ; #2  $-x+2, -y+1, -z+1$ ; **(6)** #1  $-x+1, y+1/2, -z+1/2$ ; #2  $-x, y+1/2, -z+1/2$ .
